# Supplementary material for: Research developments in the syntheses, anti-inflammatory activities and structure–activity relationships of pyrimidines
Source: Royal Society of Chemistry journal article supplement (doi:10.1039/d0ra10657g), 2021-01-01
Supplement: d0ra10657g1.pdf [file d0ra10657g1.pdf]

## SUPPORTING INFORMATION

### Research developments in the syntheses, anti-inflammatory activities and structure-activity relationships of pyrimidines

Haroon ur Rashid<sup>a,b</sup>, Marco Antonio Utrera Martines<sup>a\*</sup>, Adriana Pereira Duarte<sup>a</sup>, Juliana Jorge<sup>a</sup>, Shagufta Rasool<sup>b</sup>, Riaz Muhammad<sup>b</sup>, Nasir Ahmad<sup>c</sup>, Muhammad Naveed Umar<sup>d\*</sup>

<sup>a</sup>Institute of Chemistry, Federal University of Mato Grosso do Sul, Campo Grande, MS, Brazil

<sup>b</sup>Department of Chemistry, Sarhad University of Science and Information Technology, Peshawar, Khyber Pakhtunkhwa, Pakistan

<sup>c</sup>Department of Chemistry, Islamia College University, Peshawar, Khyber Pakhtunkhwa, Pakistan

<sup>d</sup>Department of Chemistry, University of Malakand, Chakdara, Dir (L), Khyber Pakhtunkhwa, Pakistan

\*corresponding authors e-mail addresses: marcomartines@gmail.com (M.A.U.Martines),  
m.naveedumar@uom.edu.pk (M.N.Umar)

#### Figures SI:

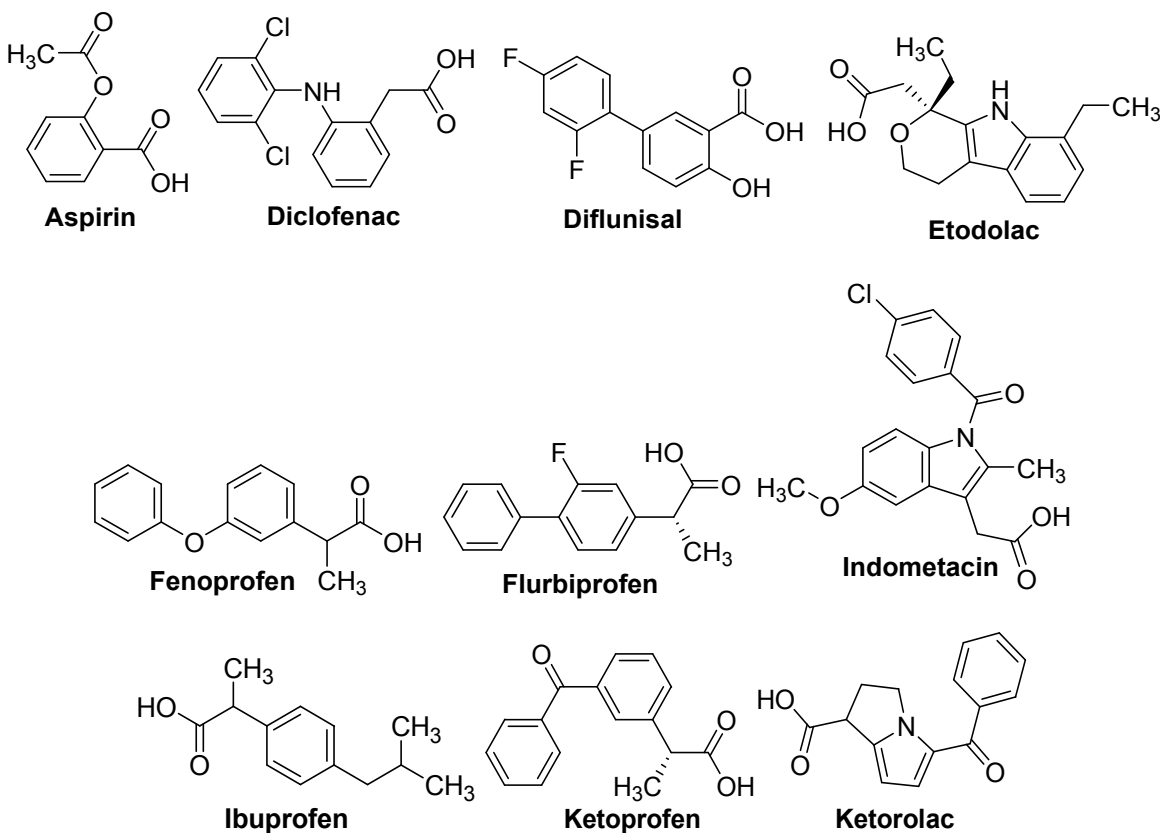

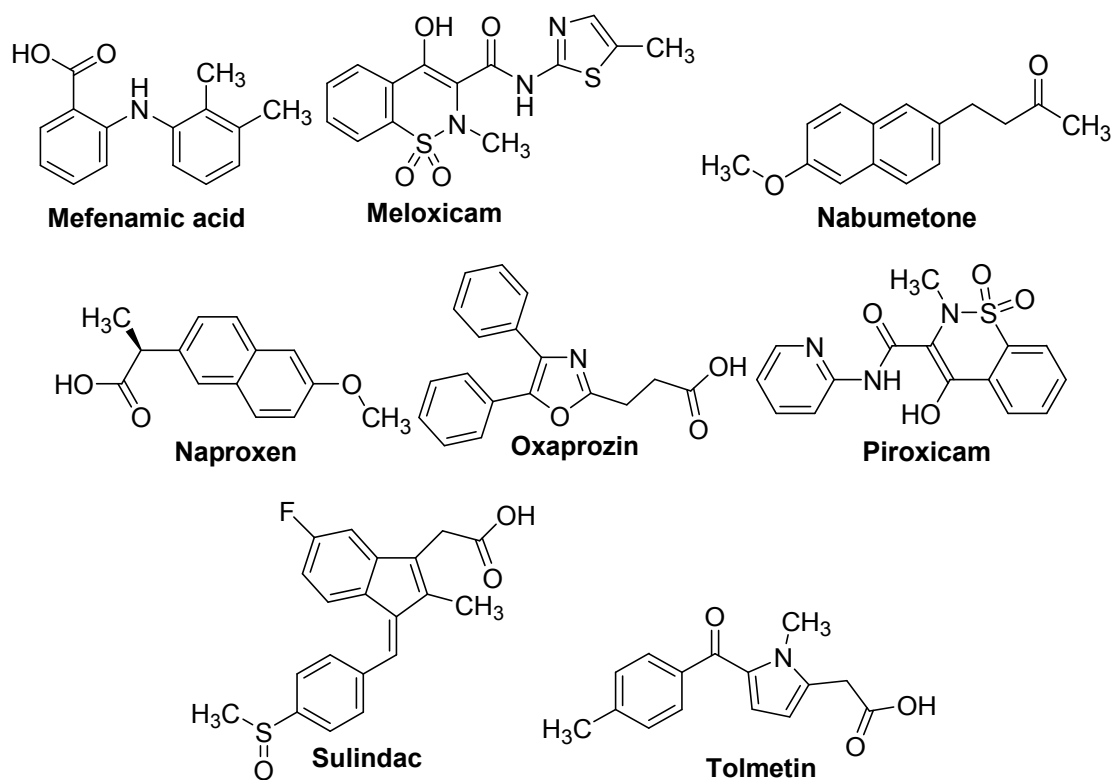

Figure SI-1: Chemical structures of selected FDA-approved NSAIDs

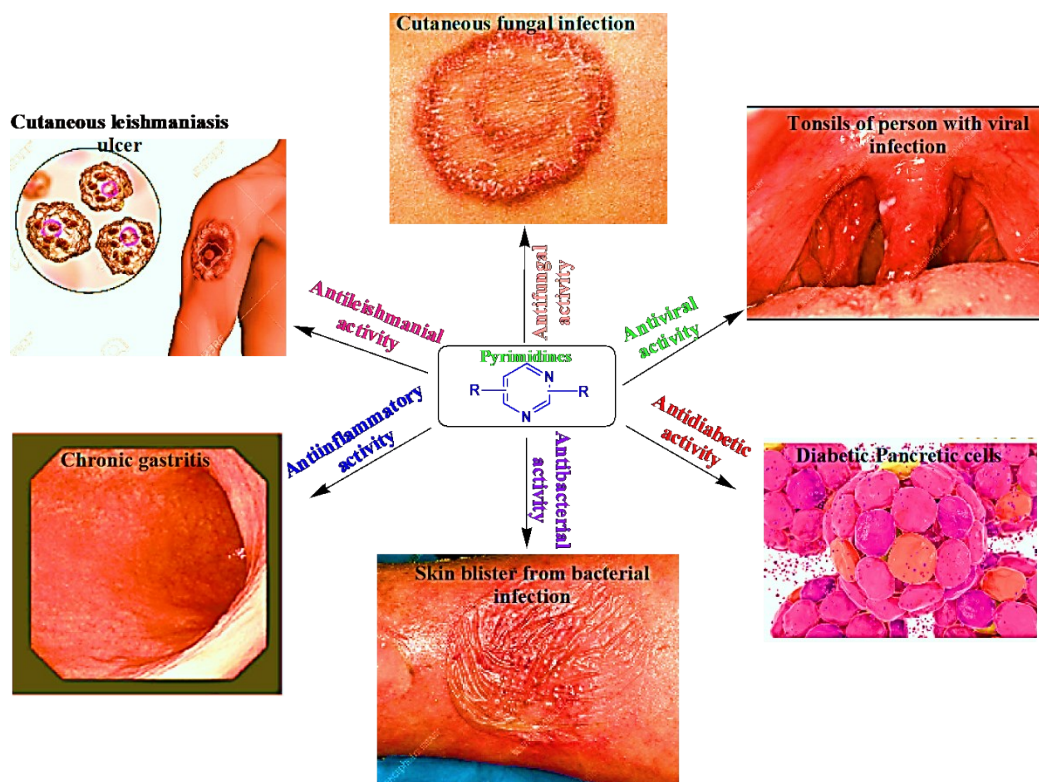

Figure SI-2: Pharmacological activities of pyrimidines

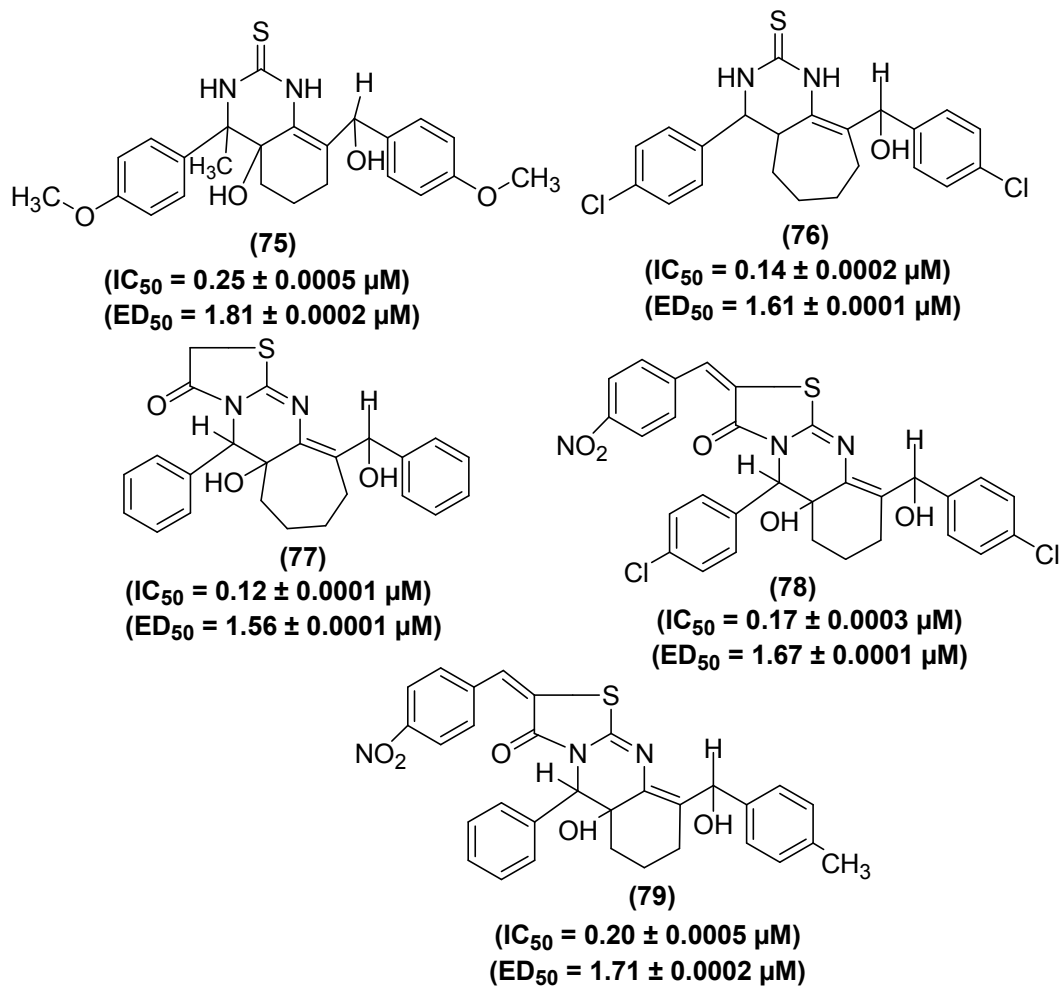

Figure SI-3: Chemical structures of selected thiopyrimidines (75-79)

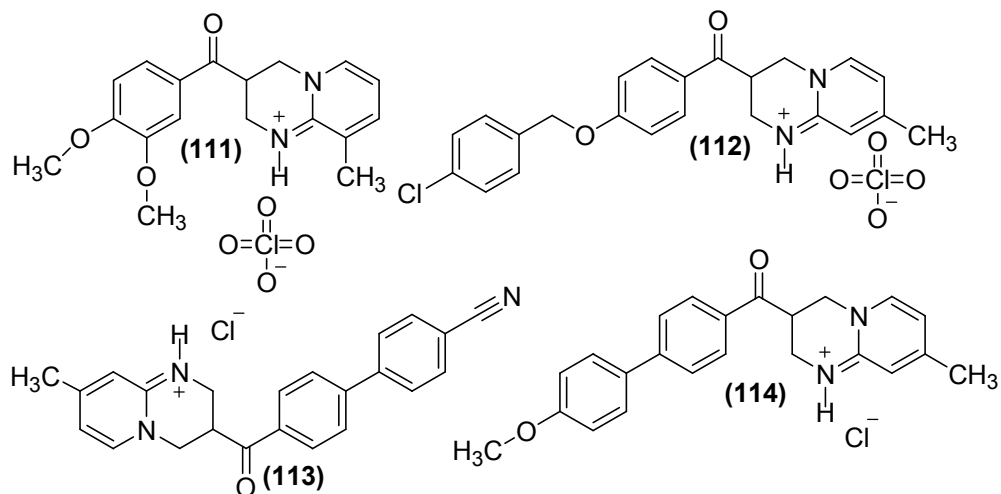

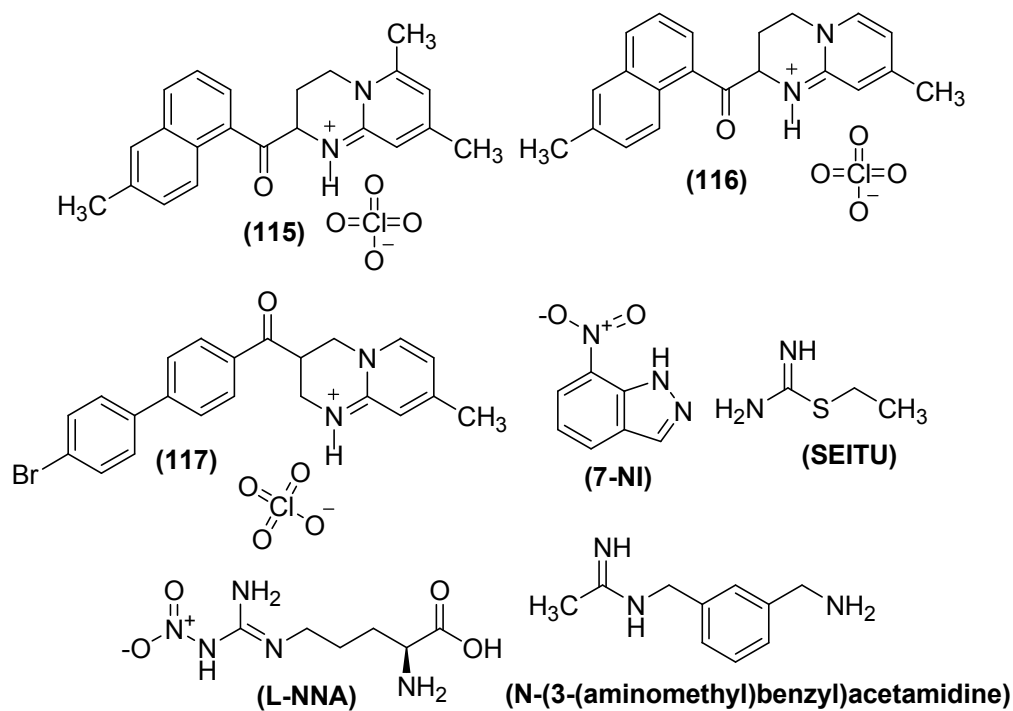

**Figure SI-4:** Chemical structures of selected pyrido[1,2-*a*]pyrimidines (111-117), and known inhibitors of NOS, *N*-(3-(aminomethyl)benzyl)acetamide, SEITU, 7-NI and L-NNA

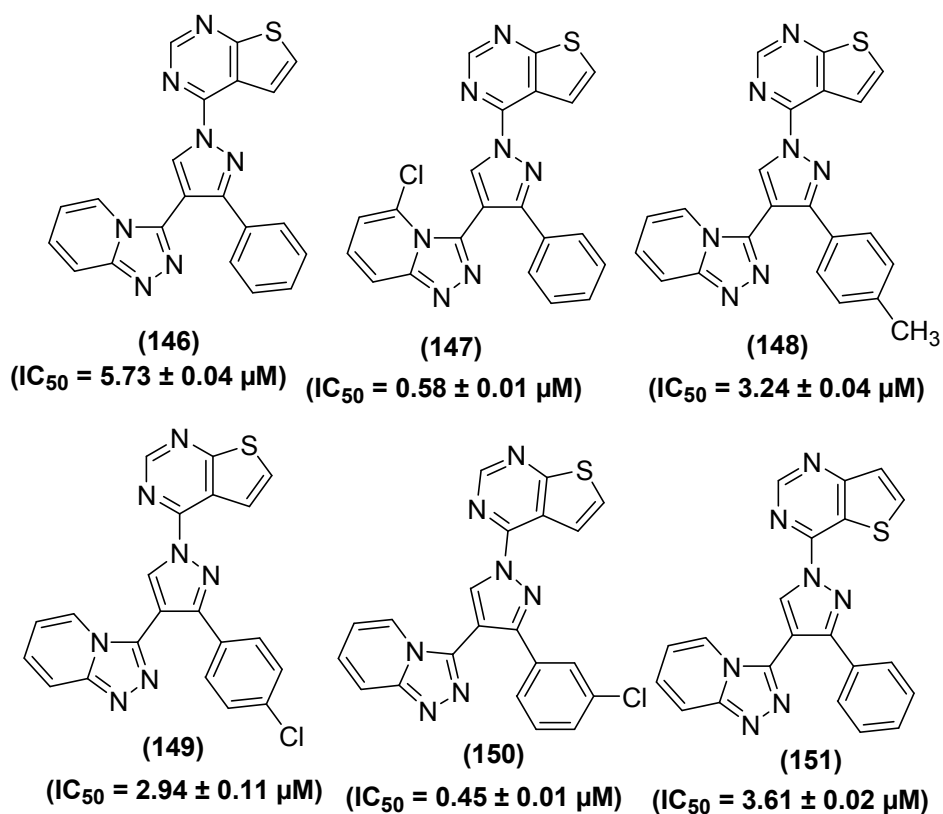

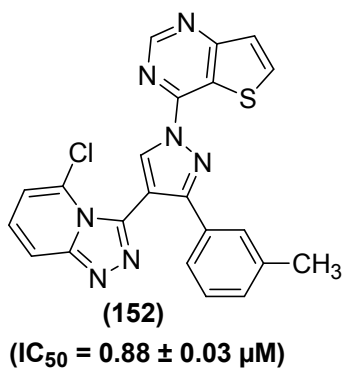

**Figure SI-5:** Chemical structures of selected thienopyrimidine derivatives (**146-152**)

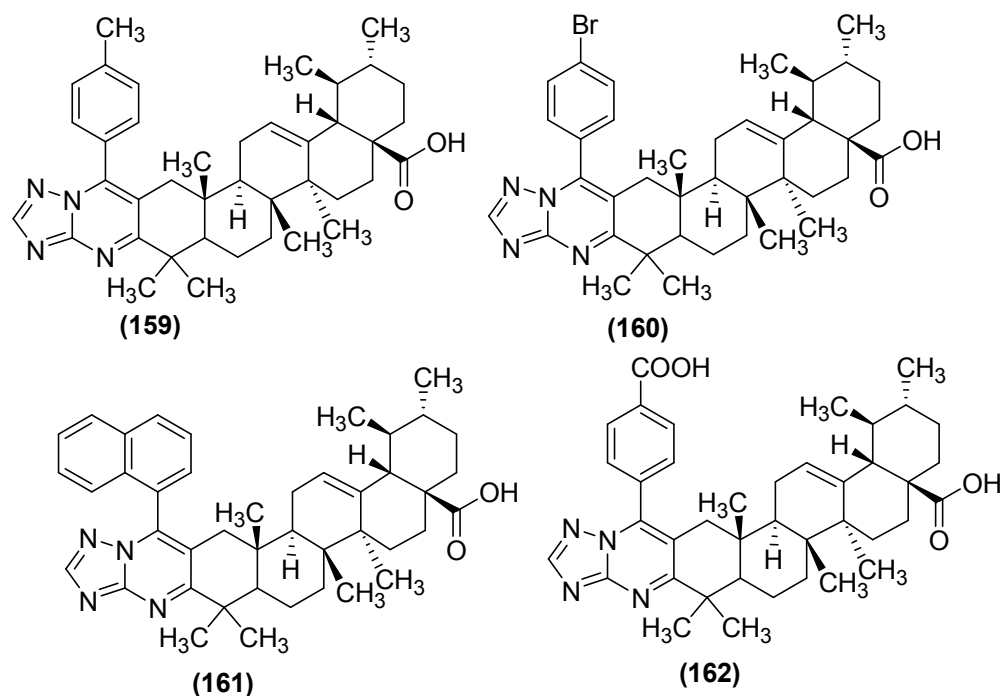

**Figure SI-6:** Chemical Structures of selected ursolic acid-based 1,2,4-triazolo[1,5-*a*]pyrimidines (**159-162**)

**Tables SI:**

**Table SI-1:** Chemical structures, IC<sub>50</sub> values, and target (COX-1/COX-2 enzyme) of the most potent pyrimidines

| Comp. No. | Chemical structure | IC <sub>50</sub> (μM) | Target (COX-1 or COX-2) | Ref. No. |
|-----------|--------------------|-----------------------|-------------------------|----------|
| 3b        |                    | 19.45 ± 0.07          | COX-1                   | 75       |

|    |                                                                                     |               |                 |    |
|----|-------------------------------------------------------------------------------------|---------------|-----------------|----|
| 4d | 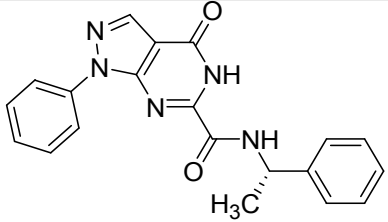   | 23.8 ± 0.20   | COX-2           | 75 |
| 5  |    | 0.04 ± 0.09   | COX-2           | 76 |
| 6  |   | 0.04 ± 0.02   | COX-2           | 76 |
| 7  |  | 0.36          | COX-2           | 77 |
| 10 |  | 2.74 and 0.22 | COX-1 and COX-2 | 78 |

|     |                                                                                     |       |       |    |
|-----|-------------------------------------------------------------------------------------|-------|-------|----|
| 24a | 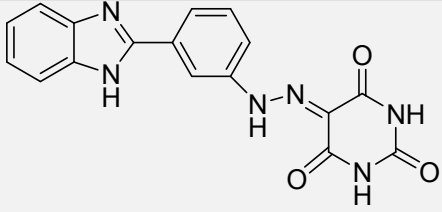   | 2.76  | COX-1 | 81 |
| 24b |    | 1.92  | COX-1 | 81 |
| 32  |    | 0.003 | COX-2 | 83 |
| 48e |   | 0.92  | COX-2 | 85 |
| 48g |  | 0.87  | COX-2 | 85 |
| 49  |  | 13    | COX-2 | 86 |

|    |  |               |       |    |
|----|--|---------------|-------|----|
| 69 |  | 0.56          | COX-2 | 91 |
| 71 |  | 0.104         | COX-2 | 92 |
| 72 |  | 0.114         | COX-2 | 92 |
| 73 |  | 0.057         | COX-2 | 92 |
| 74 |  | 0.012         | COX-2 | 93 |
| 75 |  | 0.25 ± 0.0005 | COX-2 | 94 |



|    |                                                                                     |                   |       |     |
|----|-------------------------------------------------------------------------------------|-------------------|-------|-----|
| 76 | 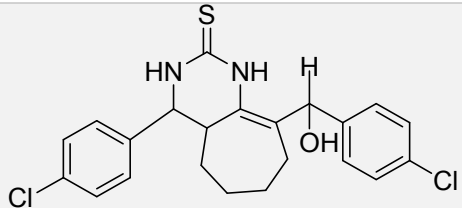   | $0.14 \pm 0.0002$ | COX-2 | 94  |
| 77 |    | $0.12 \pm 0.0001$ | COX-2 | 94  |
| 78 |    | $0.17 \pm 0.0003$ | COX-2 | 94  |
| 79 |   | $0.20 \pm 0.0005$ | COX-2 | 94  |
| 80 |  | 0.0012            | COX-2 | 95  |
| 93 |  | 1.8               | COX-2 | 100 |

|    |                                                                                     |      |       |     |
|----|-------------------------------------------------------------------------------------|------|-------|-----|
| 96 | 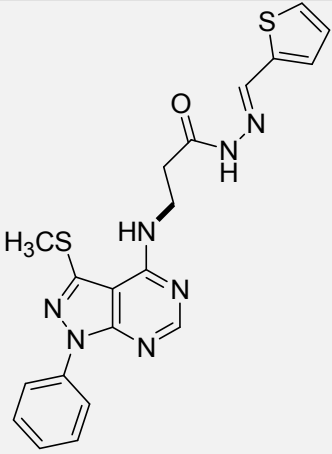   | 0.11 | COX-2 | 103 |
| 97 |   | 0.10 | COX-2 | 103 |
| 98 |  | 0.10 | COX-2 | 103 |

|     |                                                                                    |       |       |     |
|-----|------------------------------------------------------------------------------------|-------|-------|-----|
| 99  | 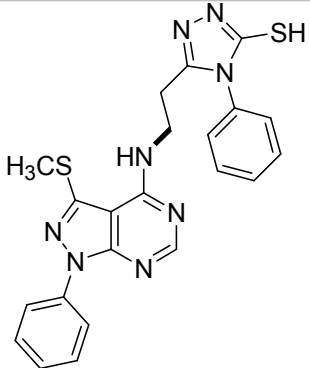  | 0.10  | COX-2 | 103 |
| 100 |   | 0.10  | COX-2 | 103 |
| 106 |  | 0.046 | COX-2 | 106 |

**Table SI-2:** Chemical structures, IC<sub>50</sub> values, and target inflammatory mediator (NO) of the most potent pyrimidines

| Comp. No. | Chemical structure                                                                  | IC <sub>50</sub> (μM) | Target inflammatory mediators | Ref. No. |
|-----------|-------------------------------------------------------------------------------------|-----------------------|-------------------------------|----------|
| 118       | 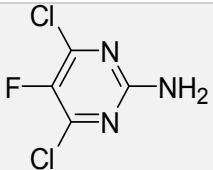 | 2                     | NO                            | 113      |

|     |                                                                                   |               |             |     |
|-----|-----------------------------------------------------------------------------------|---------------|-------------|-----|
| 119 | 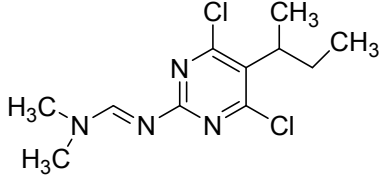 | 2.57          | NO          | 114 |
| 121 |  | 8.6 and 6.2   | NO and iNOS | 116 |
| 125 |  | 3.17 and 1.12 | NO and iNOS | 118 |

**Table SI-3:** Chemical structures, IC<sub>50</sub> values, and targets (NF-κB and cytokines) of the most potent pyrimidines

| Comp. No. | Chemical structure                                                                  | IC <sub>50</sub> (μM) | Target (NF-κB/cytokines) | Ref. No. |
|-----------|-------------------------------------------------------------------------------------|-----------------------|--------------------------|----------|
| 128       | 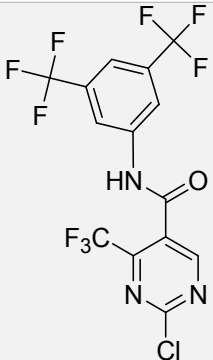 | 0.05                  | NF-κB                    | 127      |
| 129       |  | 0.05                  | NF-κB                    | 127      |

|     |                                                                                     |       |                |     |
|-----|-------------------------------------------------------------------------------------|-------|----------------|-----|
| 130 | 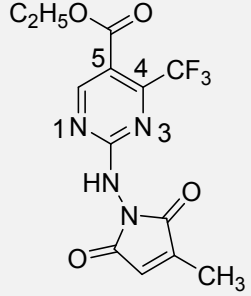   | 2     | AP-1 and NF-κB | 128 |
| 131 |    | 0.3   | AP-1 and NF-κB | 128 |
| 132 |   | 0.045 | AP-1 and NF-κB | 128 |
| 133 |  | 0.4   | AP-1 and NF-κB | 128 |
| 134 |  | 0.035 | AP-1 and NF-κB | 128 |

|     |                                                                                     |            |       |     |
|-----|-------------------------------------------------------------------------------------|------------|-------|-----|
| 135 | 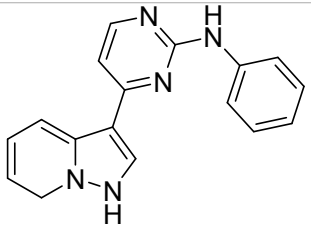   | 0.6 ± 0.05 | NF-κB | 129 |
| 136 |    | 0.122      | TNF-α | 130 |
| 137 |   | 0.176      | TNF-α | 130 |
| 138 |  | 0.092      | TNF-α | 130 |
| 139 |  | 0.135      | TNF-α | 130 |

|     |                                                                                     |                  |                                |     |
|-----|-------------------------------------------------------------------------------------|------------------|--------------------------------|-----|
| 140 | 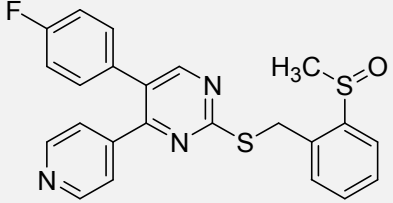   | 3.2 and 2.3      | TNF- $\alpha$ and IL-1 $\beta$ | 131 |
| 141 |    | 0.006            | MAPK and TNF- $\alpha$         | 132 |
| 142 |    | 0.040 and 0.570  | TNF- $\alpha$ and MAPK         | 132 |
| 144 |   | 0.0006 and 0.008 | TNF- $\alpha$ and MAPK         | 132 |
| 147 |  | 0.58 $\pm$ 0.01  | STAT3, IL-6                    | 134 |
| 150 |  | 0.45 $\pm$ 0.01  | STAT3, IL-6                    | 134 |

|     |                                                                                     |               |                        |     |
|-----|-------------------------------------------------------------------------------------|---------------|------------------------|-----|
| 152 | 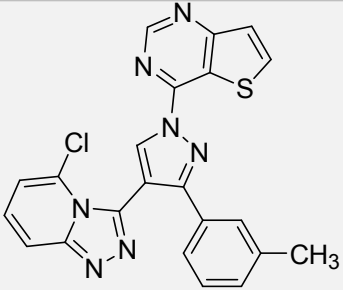   | 0.88 ± 0.03   | STAT3, IL-6            | 134 |
| 153 |    | 5.63, 4.38    | TNF- $\alpha$ , IL-6   | 135 |
| 157 |  | 0.60 and 1.16 | IL-6 and TNF- $\alpha$ | 137 |



|     |                                                                                   |               |                        |     |
|-----|-----------------------------------------------------------------------------------|---------------|------------------------|-----|
| 158 | 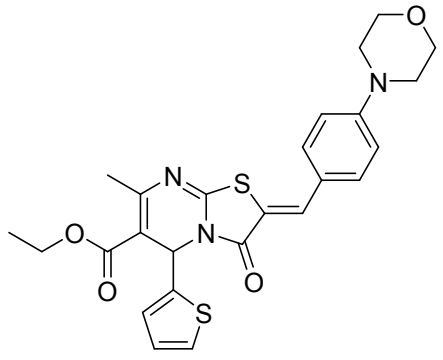 | 0.56 and 0.89 | IL-6 and TNF- $\alpha$ | 137 |
|-----|-----------------------------------------------------------------------------------|---------------|------------------------|-----|

**Table SI-4:** Chemical structures, IC<sub>50</sub> values, and targets (PDE4 and LOX enzymes) of the most potent pyrimidines

| Comp. No. | Chemical structure                                                                  | IC <sub>50</sub> ( $\mu$ M) | Target Enzyme (PDE4/LOX) | Ref. No. |
|-----------|-------------------------------------------------------------------------------------|-----------------------------|--------------------------|----------|
| 169       | 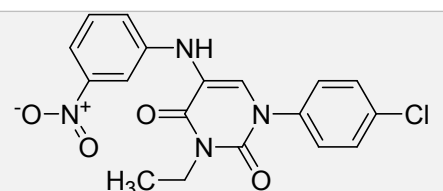  | 6.54 $\pm$ 1.38             | PDE4                     | 148      |
| 170       |  | 0.62 $\pm$ 9.92             | PDE4                     | 148      |
| 171       |  | (5.72 $\pm$ 0.80            | PDE4                     | 148      |
| 172       |  | 4.87 $\pm$ 1.37             | PDE4                     | 148      |

|     |                                                                                     |                                        |                 |     |
|-----|-------------------------------------------------------------------------------------|----------------------------------------|-----------------|-----|
| 173 | 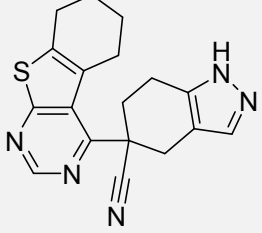   | $2.0 \pm 0.41$ and<br>$3.14 \pm 1.02$  | PDE4B and PDE4D | 149 |
| 174 |    | $1.33 \pm 0.64$ and<br>$2.84 \pm 0.64$ | PDE4B and PDE4D | 150 |
| 184 |   | 0.4 and 2.8                            | 5-LOX           | 157 |
| 185 |  | 0.5 and 3.1                            | 5-LOX           | 157 |
| 190 |  | 4.91                                   | 5-LOX           | 160 |

|     |                                                                                                                  |      |       |     |
|-----|------------------------------------------------------------------------------------------------------------------|------|-------|-----|
| 191 | <br><chem>Nc1nc2ccccc2n1</chem> | 6.98 | 5-LOX | 160 |
|-----|------------------------------------------------------------------------------------------------------------------|------|-------|-----|
